# Supplementary material
Source: MDPI journal article supplement (https://www.mdpi.com/2071-1050/14/4/2470)
Supplement: s1 [file s1]

**Table S1.** synaptic weights of MLPN1.xlsx.

[illegible]
